# Supplementary material for: Farnesylthiosalicylic acid-derivatized PEI-based nanocomplex for improved tumor vaccination
Source: PubMed Central journal article supplement — Mol Ther Nucleic Acids. 2021 Sep 20;26:594–602. doi: 10.1016/j.omtn.2021.09.006 (PMC8517092; doi:10.1016/j.omtn.2021.09.006), 2021-09-20
Supplement: mmc1.pdf [file mmc1.pdf]

OMTN, Volume 26

## **Supplemental information**

**Farnesylthiosalicylic acid-derivatized**

**PEI-based nanocomplex**

**for improved tumor vaccination**

**Yuang Chen, Yixian Huang, Haozhe Huang, Zhangyi Luo, Ziqian Zhang, Runzi Sun, Zhuoya Wan, Jingjing Sun, Binfeng Lu, and Song Li**

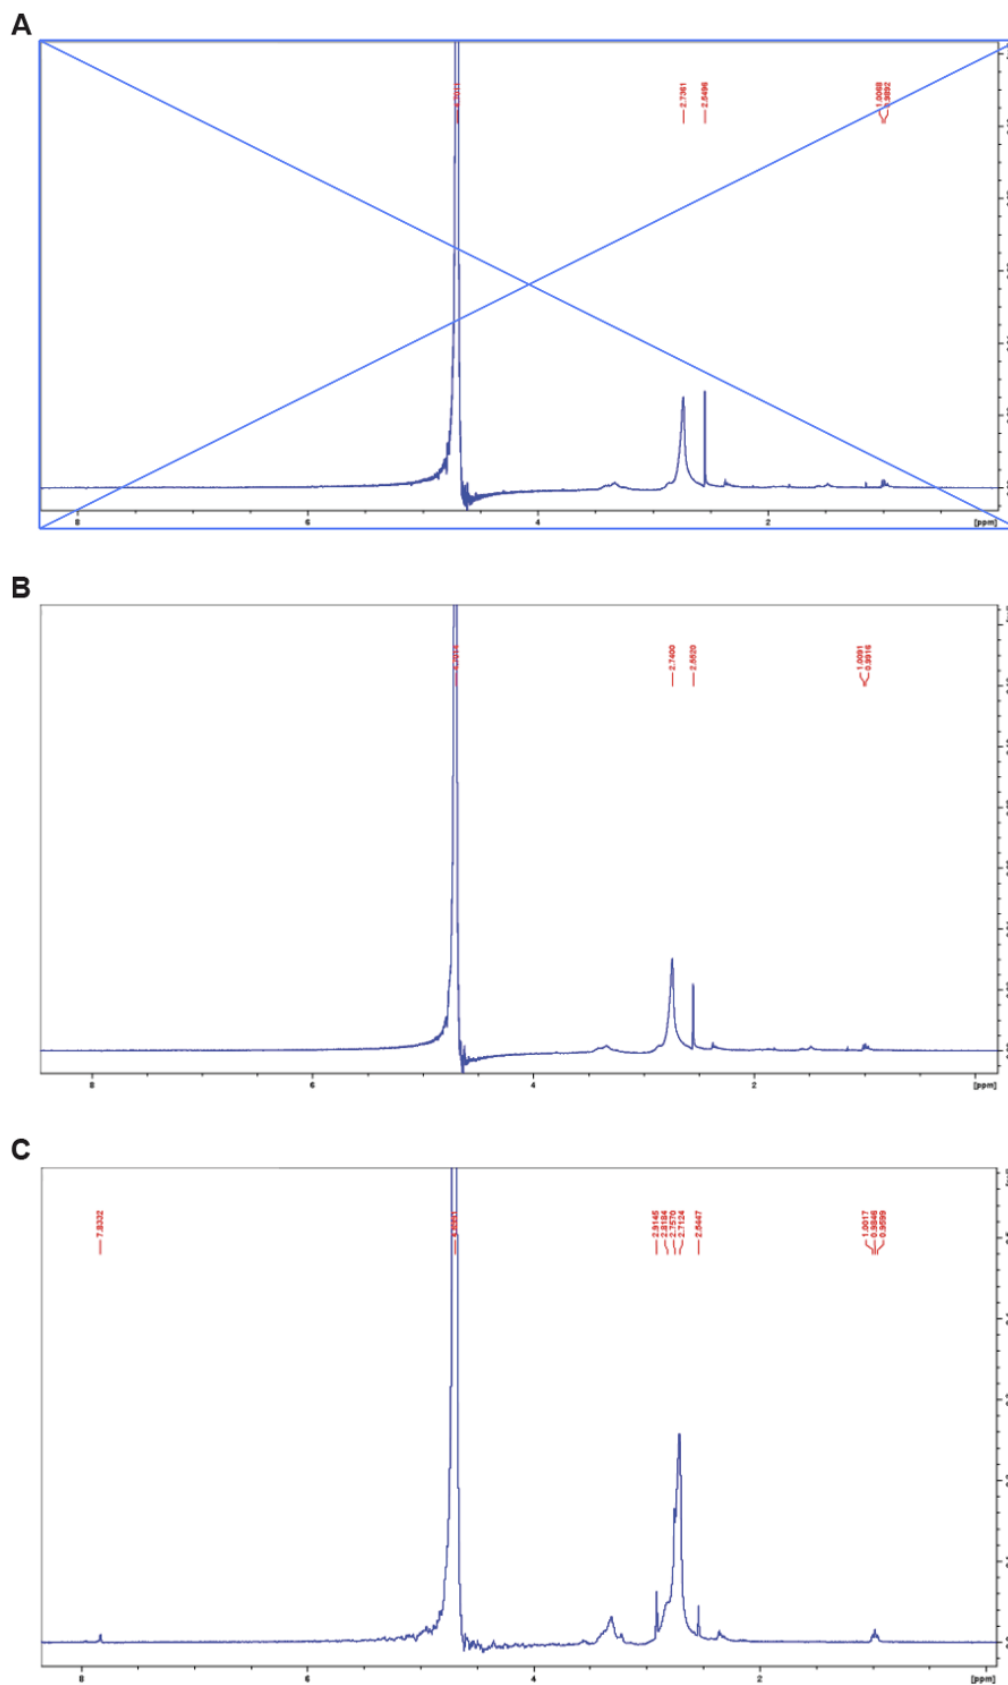

**Fig. S1.  $^1\text{H}$  nuclear magnetic resonance (NMR) spectra. (A) FTS-PEI (5% FTS, PEI  $M_w = 25\text{k Da}$ ). (B)**

**FTS-PEI (1% FTS, PEI  $M_w = 25\text{k Da}$ ). (C) FTS-PEI (1% FTS, PEI  $M_w = 2.5\text{k Da}$ ).**

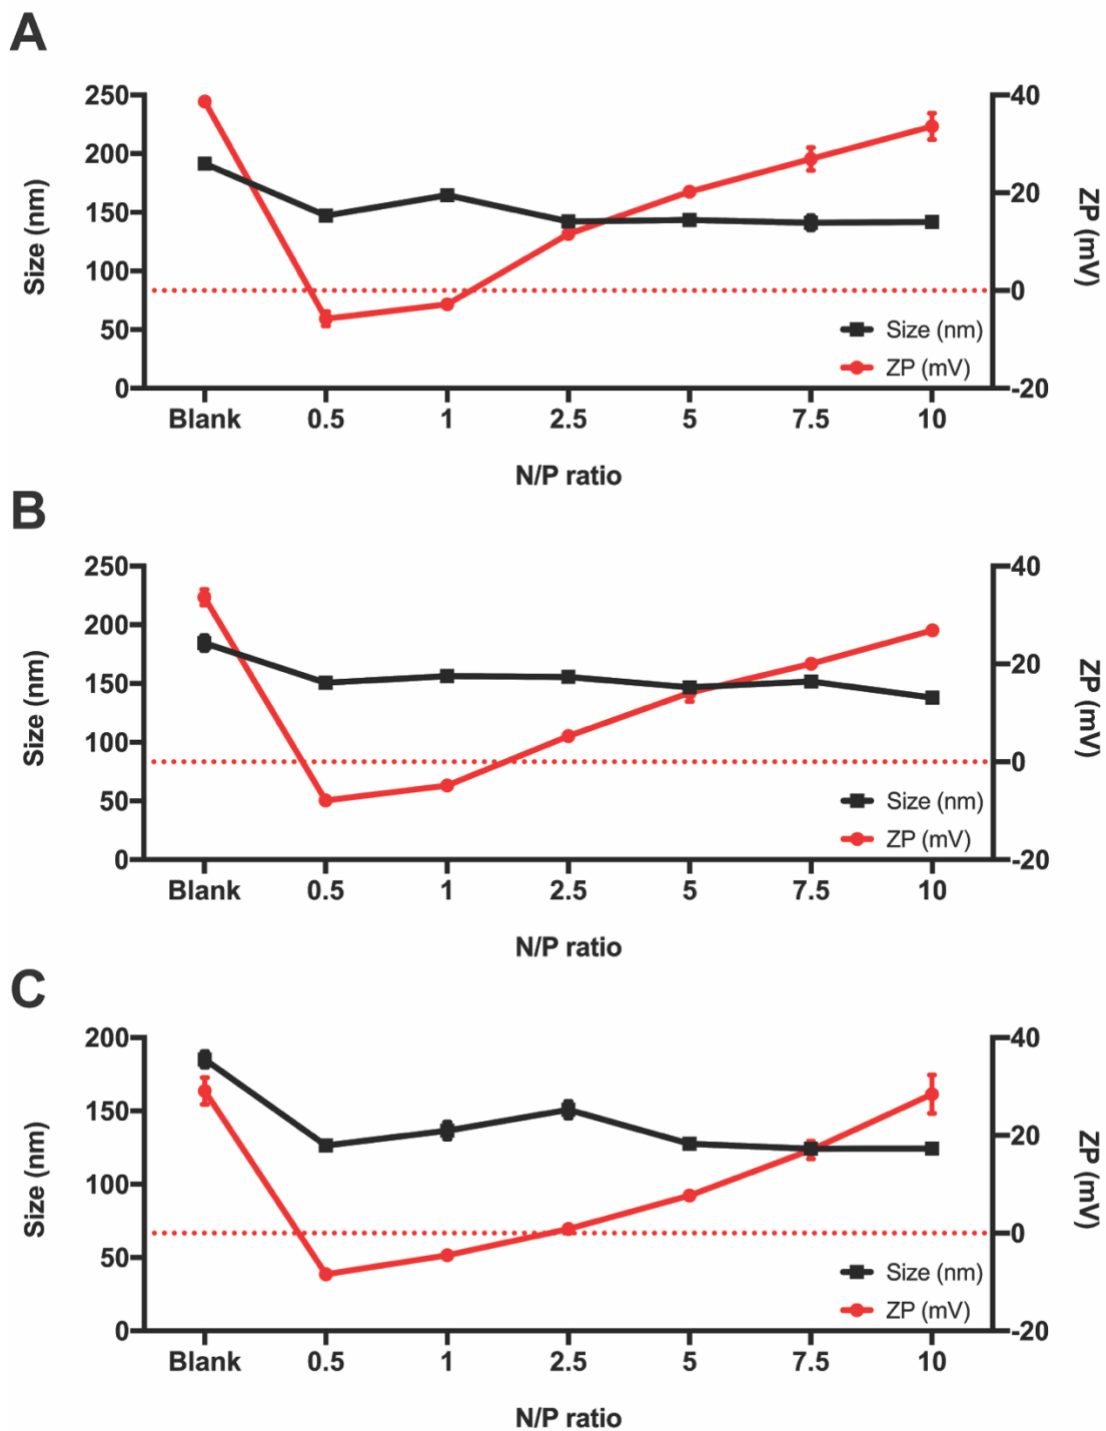

**Fig. S2. The hydrodynamic sizes and zeta potentials.** (A) FTS-PEI micelles (5% FTS, PEI MW = 25k Da) and pGFP/FTS-PEI nanocomplexes formed at various N/P ratios. (B) FTS-PEI micelles (1% FTS, PEI MW = 25k Da) and pGFP/FTS-PEI nanocomplexes formed at various N/P ratios. (C) FTS-PEI micelles (1% FTS, PEI MW = 2.5k Da) and pGFP/FTS-PEI nanocomplexes formed at various N/P ratios.

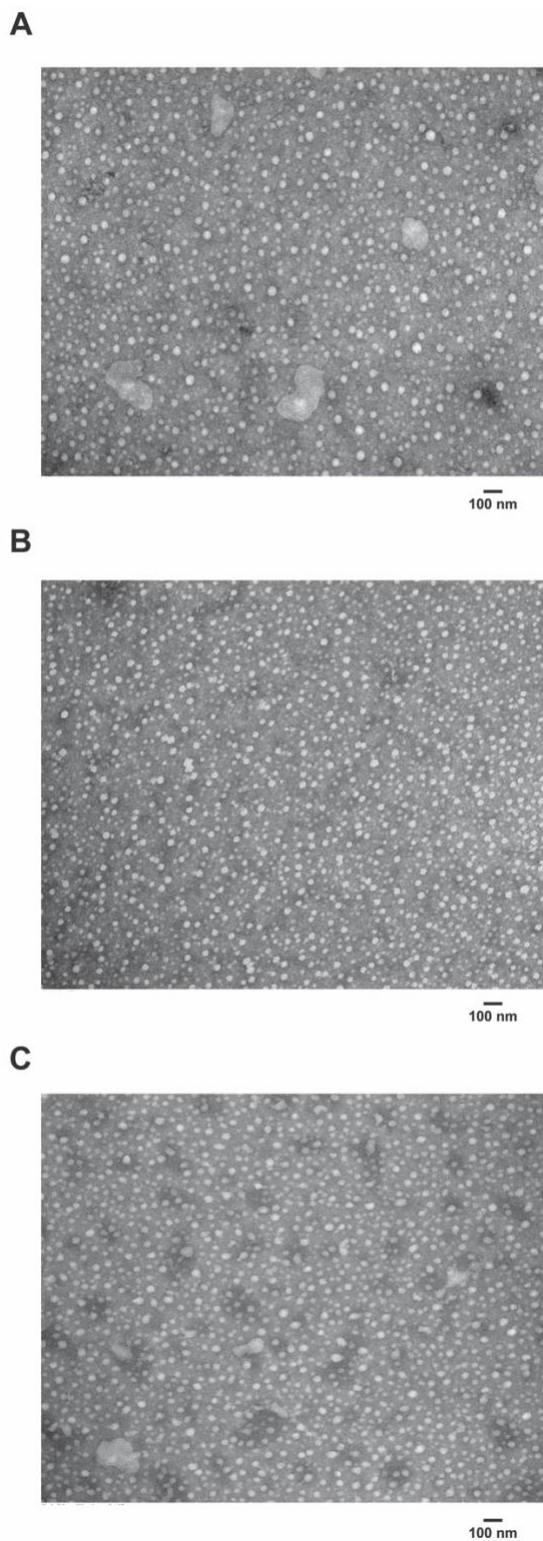

**Fig. S3. Morphology of micelles and DNA/polymer nanocomplexes examined by TEM.** Scale bar, 100 nm. **(A)** Blank FTS-PEI micelles (5% FTS, PEI MW = 2.5k Da). **(B)** pGFP/FTS-PEI nanocomplexes at a N/P ratio of 1/1. **(C)** pGFP/FTS-PEI nanocomplexes at a N/P ratio of 5/1.

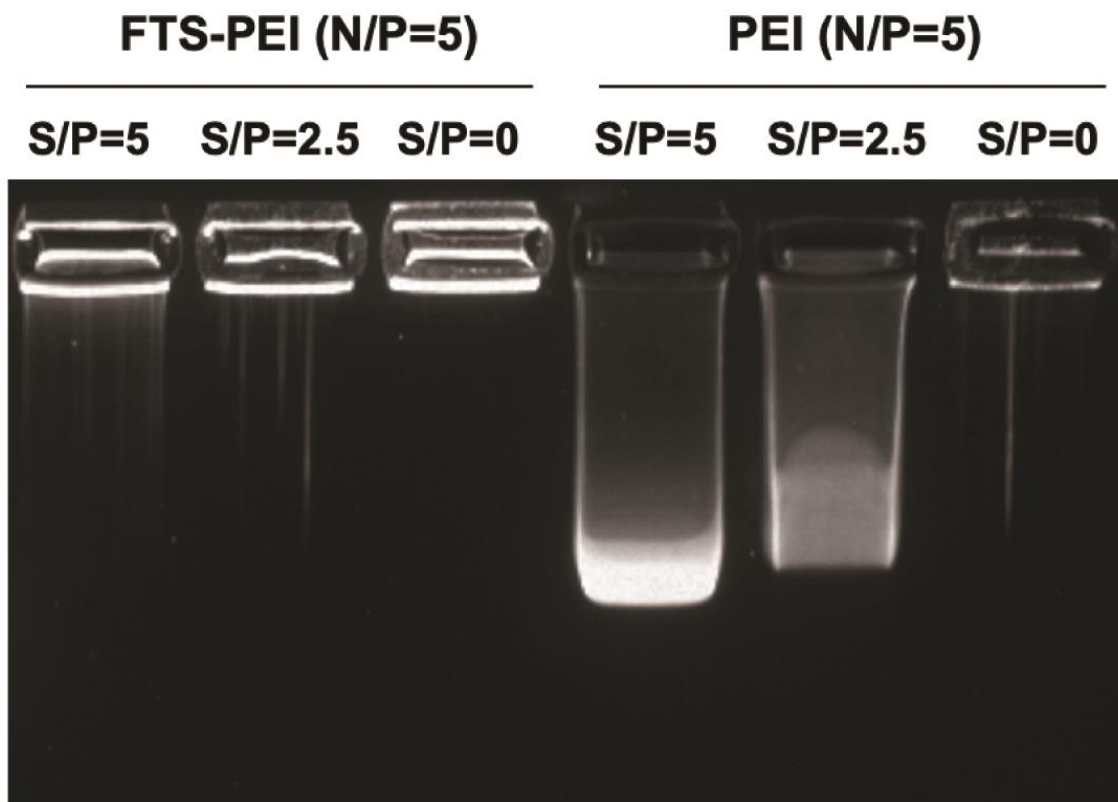

**Fig. S4.** Gel electrophoresis assay of DNA displacement from pGFP/FTS-PEI nanocomplexes (N/P = 5) by dextran sulphate at various S/P ratios.

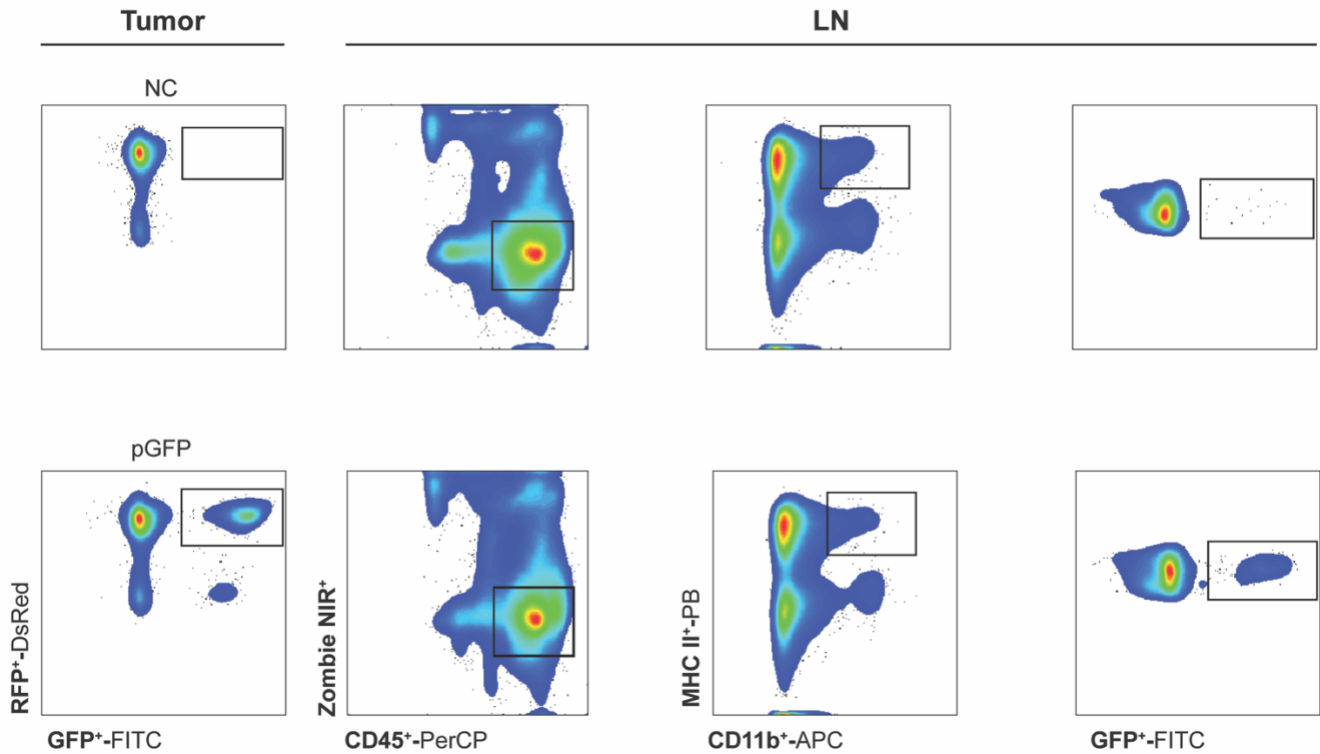

**Fig. S5. Gating strategy of tumor cells and DCs.** Tumor cells were first gated under Zombie NIR<sup>-</sup> & CD45<sup>-</sup> cell population and further characterized by tdTomato<sup>+</sup> expression. DCs were first gated under Zombie NIR<sup>-</sup> & CD45<sup>+</sup> cells as myeloid cell population and then further characterized by using Gr-1<sup>-</sup>, CD11b<sup>+</sup> & MHCII<sup>+</sup> gating.
